# Supplementary material
Source: PubMed Central journal article supplement (PMC3777620)
Supplement: NIHMS477150-supplement-Supplemental_data.pdf [file NIHMS477150-supplement-Supplemental_data.pdf]

**Figure S1.** Supervised Bayesian clustering of serum proteins harvested by nanoparticles.

**A**

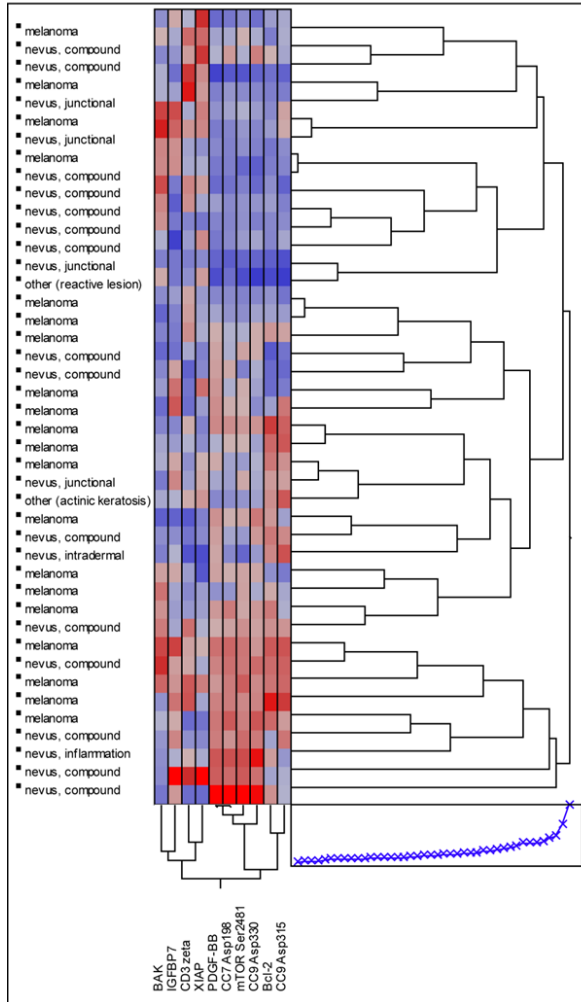

**B**

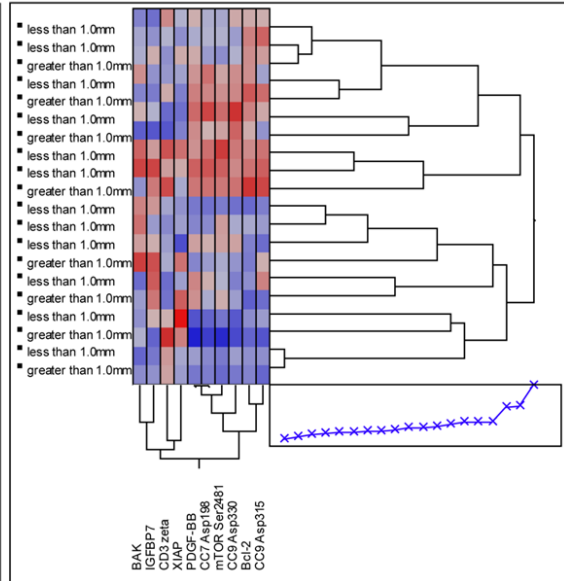

**Figure S2.** Spearman's rho non-parametric analysis for determining protein associations.

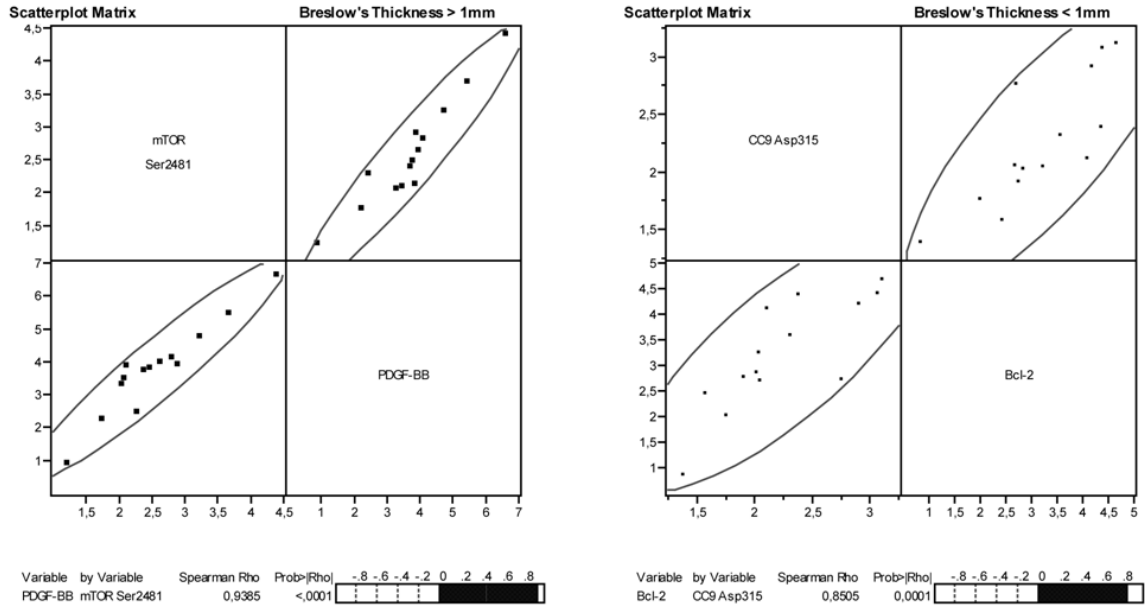

**Table S1.** Endpoints analyzed by means of RPPMA.**Table I e-supplement.** Endpoints analyzed by means of RPPMA

| <b>Antibody</b>               | <b>MW (kDa)</b> | <b>Vendor</b> | <b>Host</b> | <b>Dilution</b> |
|-------------------------------|-----------------|---------------|-------------|-----------------|
| Bcl-2                         | 28              | CellSignaling | Rabbit      | 1:200           |
| Caspase-7,<br>cleaved (D198)  | 20              | CellSignaling | Rabbit      | 1:100           |
| Caspase-9,<br>cleaved (D315)  | 35              | CellSignaling | Rabbit      | 1:100           |
| Caspase-9,<br>cleaved (D330)  | 17, 37          | CellSignaling | Rabbit      | 1:100           |
| mTOR (S2481)                  | 289             | CellSignaling | Rabbit      | 1:100           |
| XIAP                          | 53              | CellSignaling | Rabbit      | 1:100           |
| Bak                           | 25              | CellSignaling | Rabbit      | 1:50            |
| PDGF                          | 14.3            | CalBiochem    | Rabbit      | 1:50            |
| IGFBP7                        | 31              | AbCam         | Rabbit      | 1:100           |
| CD3 zeta (8D3)                | 16,32           | BD            | Mouse       | 1:50            |
| Akt (S473)                    | 60              | CellSignaling | Rabbit      | 1:100           |
| Akt (T308)                    | 60              | CellSignaling | Rabbit      | 1:100           |
| Bcl-2 (T56)                   | 28              | CellSignaling | Rabbit      | 1:200           |
| Catenin (beta)<br>(T41/S45)   | 85              | CellSignaling | Rabbit      | 1:50            |
| c-Kit (CD117)                 | 145,125,95      | Zymed         | Rabbit      | 1:250           |
| c-Kit (Y719)                  | 120, 145        | CellSignaling | Rabbit      | 1:250           |
| c-Kit (Y721)                  | 145, 125, 95    | Zymed         | Rabbit      | 1:2000          |
| CREB (S133)                   | 43              | CellSignaling | Rabbit      | 1:200           |
| ERK 1/2<br>(T202/Y204)        | 42, 44          | CellSignaling | Rabbit      | 1:2000          |
| MEK1 (S298)                   | 45              | CellSignaling | Rabbit      | 1:2000          |
| MEK1/2<br>(S217/221)          | 45              | CellSignaling | Rabbit      | 1:500           |
| Met<br>(Y1234/1235)           | 145             | CellSignaling | Rabbit      | 1:200           |
| PTEN (S380)                   | 54              | CellSignaling | Rabbit      | 1:500           |
| VEGFR 2<br>(Y1175)<br>(19A10) | 230             | CellSignaling | R mAb       | 1:50            |
